# Supplementary material for: Divergent selection along climatic gradients in a rare central European endemic species, Saxifraga sponhemica
Source: PubMed Central journal article supplement — Ann Bot. 2015 Apr 9;115(7):1177–90. doi: 10.1093/aob/mcv040 (PMC4648456; doi:10.1093/aob/mcv040), 2015-04-09

## SUPPLEMENTARY DATA

Fig. S1. Relationship between population means of (a) the length of stems and (b) the number of flowerstems per rosette of *S. sponhemica* plants measured in the field and in the common garden.

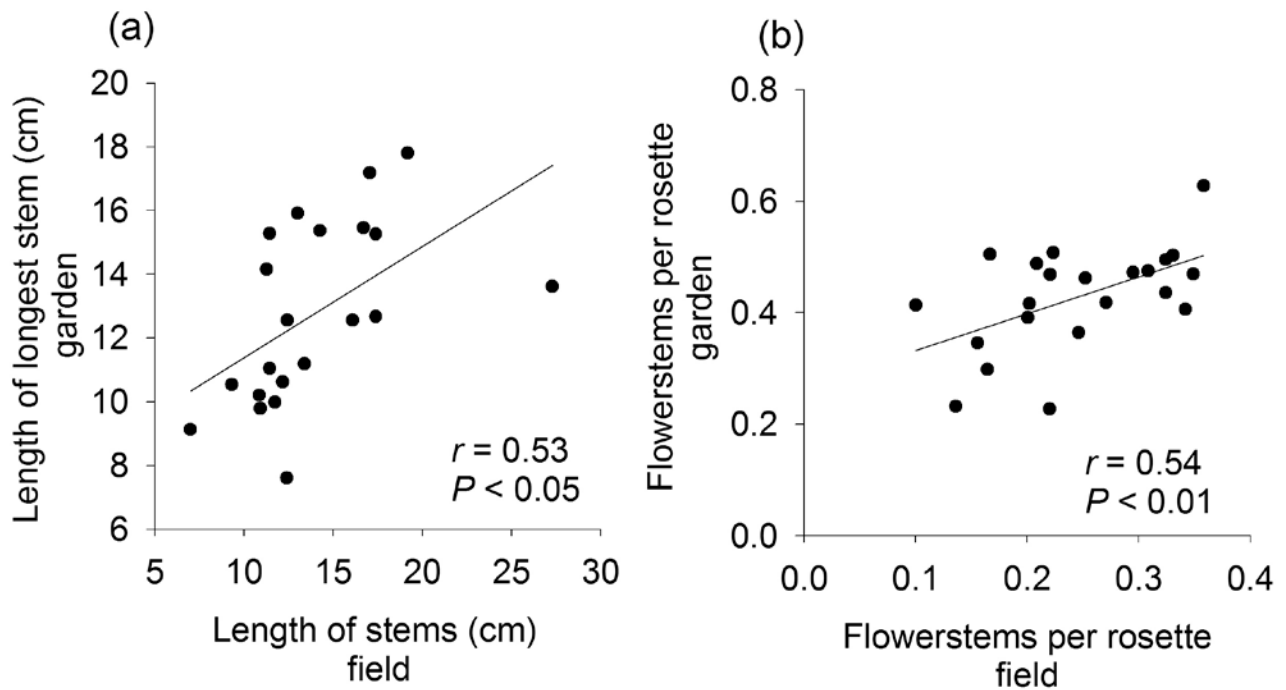

Fig. S2. Relationship between (a) plant diameter, (b) number of rosettes, (c) PC PLANTSIZE, (d) number of flowers, (e) PC REPRO in populations and their molecular diversity  $H_{eN}$ .

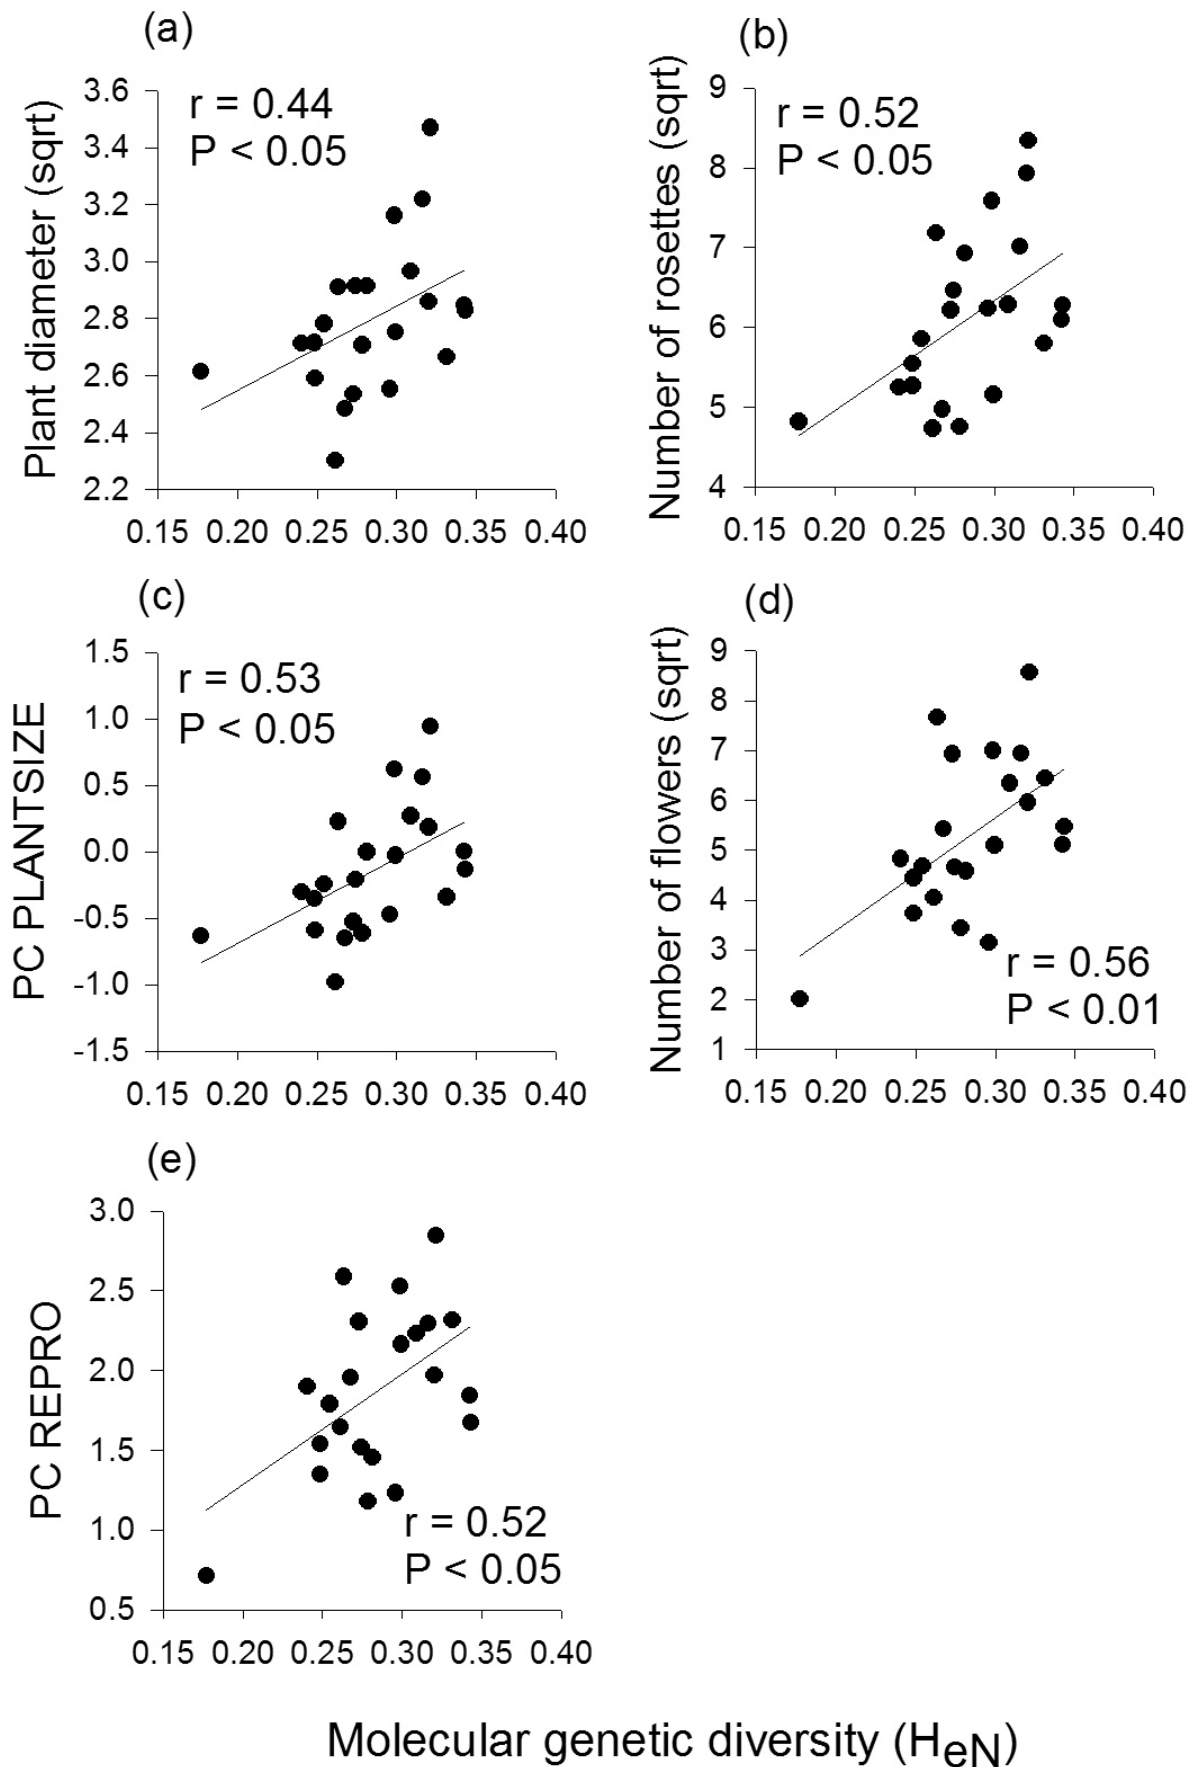

Supplement: supp_mcv040_aob-14692-s01.pdf [file supp_mcv040_aob-14692-s01.pdf]
